# Supplementary figures and images for: Leptin Induces Sca-1+ Progenitor Cell Migration Enhancing Neointimal Lesions in Vessel-Injury Mouse Models
Source: PubMed Central journal article supplement — Arterioscler Thromb Vasc Biol. 2017 Oct 25;37(11):2114–27. doi: 10.1161/ATVBAHA.117.309852 (PMC5671780; doi:10.1161/atvbaha.117.309852), 2017-10-25

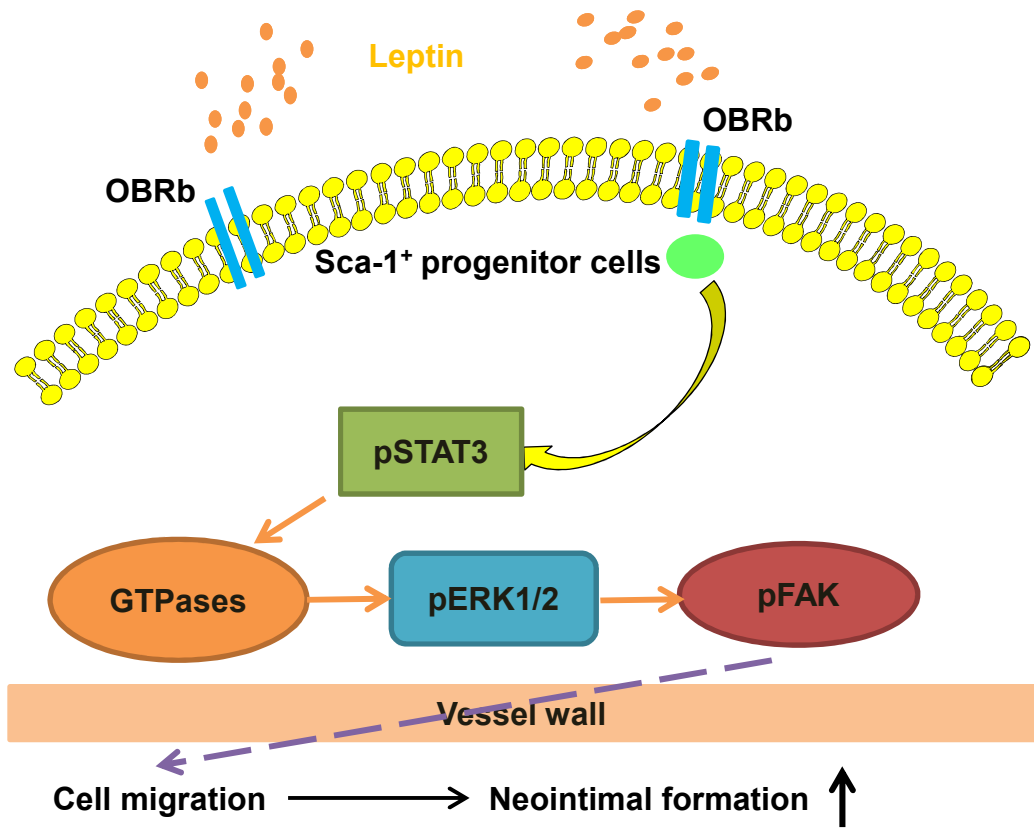

Supplement: atv-37-2114-s002.pdf [file atv-37-2114-s002.pdf]
